# Supplementary material for: The International Fragile X Premutation Registry: building a resource for research and clinical trial readiness
Source: HighWire-hosted journal article supplement (doi:10.1136/jmedgenet-2022-108568), 2022-06-14
Supplement: jmedgenet-2022-108568supp001_data_supplement.pdf [file jmedgenet-2022-108568supp001_data_supplement.pdf]

Confidential

Page 1

Languages

- English  
 Español

Why am I being invited to take part in a registry? We invite you to take part in this Registry if you are 18 or over and are a carrier of a fragile X premutation or are a member of a family affected by fragile X. If you agree to participate you will be asked to provide contact information demographic information and basic medical information so that you can be invited to participate in future research projects focused on understanding and treating fragile X premutation-associated conditions. Premutation carriers who have been diagnosed with or have symptoms of fragile X-associated tremor/ataxia syndrome (FXTAS) or fragile X-associated primary ovarian insufficiency (FXPOI) as well as carriers without these problems are encouraged to participate.

Why is this registry being created? The primary goal of the Registry is to build up a large and diverse group of people interested in participating in research to better understand the effects of the premutation on human health and find effective treatments for premutation-related conditions. Registrants may be contacted by the Registry team about research studies for which they may be eligible. Registrants will not be directly contacted by the researchers. To date the majority of premutation studies have not adequately represented people from different backgrounds. The Registry team will share research opportunities via multiple methods to help investigators recruit a diverse and inclusive group of participants for their studies. People who join the Registry will be connected to an international community interested in premutation research and will periodically be sent updates via a newsletter about new research findings pertaining to the premutation.

FOR MUCH MORE DETAIL ABOUT THE REGISTRY AND YOUR RIGHTS AND PROTECTIONS AS A PARTICIPANT PLEASE BE SURE TO READ THE INFORMED CONSENT PDF DOCUMENT BELOW.

Consent form

[Attachment: "Premutation Registry Consent.pdf"]

Formulario de consentimiento

[Attachment: "Consentimiento del Registro.pdf"]

Do you wish to join the registry? \*must provide value  
(note)

- Yes  
 No

Please tell us the primary reason that you have chosen not to join the registry.

- I do not qualify.  
 I have concerns about sharing personal identifying information.  
 I have concerns about sharing health information.  
 There was a technical problem.  
 I changed my mind about wanting to participate in future research.  
 It appeared that it will take too much time/I am too busy.  
 Other reason

Language

- English  
 Español

Your signature documents that you have read the informed consent and have given permission to be part of this registry. \*must provide value

(note)

*Confidential*

Page 2

---

Legal Authorized Representative Signature A legally authorized representative (LAR) may provide consent on behalf of a registrant. You acknowledge that you have read the informed consent form, and by signing you give permission for the person to register. Please respond to all questions according to registrants responses.

---

(note)

---

Legal Authorized Representative Name

---

Today's Date \*must provide value

---

(note)

---

First Name (as it appears on your birth certificate) \*must provide value

---

Last name (current) \*must provide value

---

Email address \*must provide value

---

#### PERSONAL REGISTRATION DETAILS

---

\*\* NOTE: Your internet browser may be set to "autofill" or "autocomplete" form fields, such as an address field. This can cause difficulty in completion of the registry information. We recommend turning off this function in your browser's settings. See the following website for instructions for each browser type: autofill (Link opens in new window)

\*\* NOTA: Su navegador de internet puede estar configurado para "auto llenar" o "autocompletar" los campos de respuesta del formato como el de dirección. Esto puede causar dificultades para completar la información del registro. Recomendamos desactivar esta función en las herramientas de su navegador. Vea el siguiente sitio web para instrucciones para cada tipo de navegador: autocompletar (abre en una ventana nueva.)

---

Nickname

---

Middle name

*Confidential*

Page 3

---

Last name (as it appears on your birth certificate)

---

---

City or municipality of birth (as it appears on your birth certificate)

---

---

Sex at birth \*must provide value

- Female  
 Male

---

Birth year \*must provide value

---

((Use el formato AAAA.))

---

Date of birth \*must provide value

---

( note)

---

---

Street address of residence \*must provide value

---

---

City of residence \*must provide value

---

*Confidential*

Page 4

---

State or territory of residence (U.S. ONLY)

- Alabama
- Alaska
- Samoa Americana
- Arizona
- Arkansas
- California
- Colorado
- Connecticut
- Delaware
- Distrito de Columbia
- Florida
- Georgia
- Guam
- Hawai
- Idaho
- Illinois
- Indiana
- Iowa
- Kansas
- Kentucky
- Luisiana
- Maine
- Maryland
- Massachusetts
- Michigan
- Minnesota
- Misisipí
- Misuri
- Montana
- Nebraska
- Nevada
- New Hampshire
- New Jersey
- Nuevo Mexico
- Nueva York
- Carolina del Norte
- Dakota del Norte
- Islas Marianas del Norte
- Ohio
- Oklahoma
- Oregón
- Pensilvania
- Puerto Rico
- Rhode Island
- Carolina del Sur
- Dakota del Sur
- Tennessee
- Texas
- Utah
- Islas Vírgenes de EE.UU
- Vermont
- Virginia
- Washington
- Virginia del Oeste
- Wisconsin
- Wyoming

---

Zip code or mail code of residence \*must provide value

---

Confidential

Page 5

Country of residence

\*must provide value

- Afghanistan
- Albania
- Algeria
- Andorra
- Angola
- Antigua and Barbuda
- Argentina
- Armenia
- Australia
- Austria
- Azerbaijan
- Bahamas
- Bahrain
- Bangladesh
- Barbados
- Belarus
- Belgium
- Belize
- Benin
- Bhutan
- Bolivia
- Bosnia and Herzegovina
- Botswana
- Brazil
- Brunei
- Bulgaria
- Burkina Faso
- Burundi
- Cabo Verde
- Cambodia
- Cameroon
- Canada
- Central African Republic (CAR)
- Chad
- Chile
- China
- Colombia
- Comoros
- Democratic Republic of the Congo
- Costa Rica
- Cote d'Ivoire
- Croatia
- Cuba
- Cyprus
- Czechia
- Denmark
- Djibouti
- Dominica
- Dominican Republic
- Ecuador
- Egypt
- El Salvador
- Equatorial Guinea
- Eritrea
- Estonia
- Eswatini (formerly Swaziland)
- Ethiopia
- Fiji
- Finland
- France
- Gabon
- Gambia
- Georgia
- Germany
- Ghana

03/09/2022 11:33am

Powered by REDCap

- Greece
- Grenada
- Guatemala
- Guinea
- Guinea-Bissau
- Guyana
- Haiti
- Honduras
- Hungary
- Iceland
- India
- Indonesia
- Iran
- Iraq
- Ireland
- Israel
- Italy
- Jamaica
- Japan
- Jordan
- Kazakhstan
- Kenya
- Kiribati
- Kosovo
- Kuwait
- Kyrgyzstan
- Laos
- Latvia
- Lebanon
- Lesotho
- Liberia
- Libya
- Liechtenstein
- Lithuania
- Luxembourg
- Madagascar
- Malawi
- Malaysia
- Maldives
- Mali
- Malta
- Marshall Islands
- Mauritania
- Mauritius
- Mexico
- Micronesia
- Moldova
- Monaco
- Mongolia
- Montenegro
- Morocco
- Mozambique
- Myanmar (formerly Burma)
- Namibia
- Nauru
- Nepal
- Netherlands
- New Zealand
- Nicaragua
- Niger
- Nigeria
- North Korea
- North Macedonia (formerly Macedonia)
- Norway
- Oman
- Pakistan
- Palau
- Palestine
- Panama
- Papua New Guinea
- Paraguay

- Peru
- Philippines
- Poland
- Portugal
- Qatar
- Romania
- Russia
- Rwanda
- Saint Kitts and Nevis
- Saint Lucia
- Saint Vincent and the Grenadines
- Samoa
- San Marino
- Sao Tome and Principe
- Saudi Arabia
- Senegal
- Serbia
- Seychelles
- Sierra Leone
- Singapore
- Slovakia
- Slovenia
- Solomon Islands
- Somalia
- South Africa
- South Korea
- South Sudan
- Spain
- Sri Lanka
- Sudan
- Suriname
- Sweden
- Switzerland
- Syria
- Taiwan
- Tajikistan
- Tanzania
- Thailand
- Timor-Leste
- Togo
- Tonga
- Trinidad and Tobago
- Tunisia
- Turkey
- Turkmenistan
- Tuvalu
- Uganda
- Ukraine
- United Arab Emirates (UAE)
- United Kingdom (UK)
- United States of America (USA)
- Uruguay
- Uzbekistan
- Vanuatu
- Vatican City (Holy See)
- Venezuela
- Vietnam
- Yemen
- Zambia
- Zimbabwe

---

Phone number (including country code if outside the U.S.) \*must provide value

---

Confidential

Page 8

---

Password \*must provide value

---

(note)

---

Which language do you usually speak and read? \*must provide value

- Mandarin Chinese
- Spanish
- English
- Hindi
- Bengali
- Portuguese
- Russian
- Japanese
- Western Punjabi
- Marathi
- Telugu
- Wu Chinese
- Turkish
- Korean
- French
- German
- Vietnamese
- Tamil
- Yue Chinese
- Urdu
- Italian
- Other - list below

---

Other Language

---



*Confidential*

Page 9

---

**Other Languages**

- Mandarin Chinese
- Spanish
- English
- Hindi
- Bengali
- Portuguese
- Russian
- Japanese
- Western Punjabi
- Marathi
- Telugu
- Wu Chinese
- Turkish
- Korean
- French
- German
- Vietnamese
- Tamil
- Yue Chinese
- Urdu
- Italian
- Other - list below

---

**Other additional languages**  

---

---

**FRAGILE X-RELATED INFORMATION**

---

**fmr1 DNA Test?**

- Yes
- No
- I don't know

---

**What is the main reason that you had fragile X testing?**

- Prefer not to answer
- I had a clinical problem that was thought to be due to fragile X
- Research participation
- A family member tested positive for fragile X
- Other (please list below)

---

**Other reason for fragile X testing:**  

---

Confidential

Page 10

---

What is your Fragile X (FMR1) Status \*must provide value  
(If mosaic (more than one CGG category), please choose the largest CGG category.)

- Prefer not to answer
- Unknown
- Normal (up to 44 CGG repeats)
- Grey or intermediate (45-54 CGG repeats)
- Premutation (55-200 CGG repeats)
- Full mutation (>200 CGG repeats)
- Not tested, assumed to be a fragile X premutation carrier by family history
- Not tested, assumed NOT to be a fragile X premutation carrier by family history

---

CGG repeat number

\_\_\_\_\_

---

Are you the first person in your extended family to be identified with a fragile X mutation?

- Yes
- No
- I don't know

---

Please upload a copy of your most recent FMR1 DNA test result. If you cannot locate it or never had the testing, please skip this item. If you do not have a copy available, you may be able to obtain a copy from your primary physician or the lab that provided the testing, which can be uploaded the next time you update your registry information.

---

How many biological children do you have?

\_\_\_\_\_

---

How many of your biological children have fragile X syndrome (full mutation) confirmed by fragile X DNA testing?

\_\_\_\_\_

---

How many of your biological children have the fragile X premutation?

\_\_\_\_\_

---

How many of your biological children do not have a fragile X mutation (normal result by DNA testing)?

\_\_\_\_\_

---

How many of your biological children have not had fragile X DNA testing (their status is unknown)?

\_\_\_\_\_

Confidential

Page 11

---

Have you been diagnosed with fragile X - associated tremor/ataxia syndrome (FXTAS) by a medical professional?  
\*must provide value

- Prefer not to answer  
 Yes  
 No  
 I don't know

---

Have you been diagnosed by a medical professional with fragile X-associated primary ovarian insufficiency (FXPOI), premature ovarian failure (POF), or abnormally early menopause?

\*must provide value

- Prefer not to answer  
 Yes  
 No  
 I don't know

---

#### FUTURE SHARING OF BIOLOGICAL SAMPLES

---

Are you interested in providing biological samples (e.g., blood, saliva) in future research studies?

\*must provide value

- Yes  
 No  
 Maybe/depends

---

Are you interested in the possibility of being a tissue donor after death (e.g. brain or other body tissues)? \*must provide value

- Yes  
 No  
 Maybe/depends

---

#### SECONDARY CONTACT

---

Name and address of the secondary contact.

---

Email address for the secondary contact (if you don't have an email address, please write "NA")

---

---

Phone number for the secondary contact (including country code if outside the U.S.). If you do not have a phone number for this person, please write "NA".

---

*Confidential*

Page 12

---

How did you hear about this registry? (Check all that apply.)

- Prefer not to answer
- National Fragile X Foundation
- Local fragile X support organization
- Family member
- Medical or other health provider
- Social media
- Fragile X clinic
- Researcher
- Friend
- Other - please describe below

---

Other way you heard about the registry

\_\_\_\_\_

---

YOU HAVE COMPLETED THE ESSENTIAL REGISTRY INFORMATION. Thank you!

---

surveytextregistry\_essentials

\_\_\_\_\_

---

languages

- English
- Español

---

**DEMOGRAPHICS** The questions in this section will help the registry team and researchers better determine your eligibility for future studies. By answering "yes", the registry survey will give you the opportunity to provide this information (e.g., gender identity, education, marital status, race and ethnicity, and languages you speak). You can choose to answer or not answer any question. Answering "no" will take you to the next section. Do you choose to provide demographic information? \*must provide value

- Yes
- No

---

Gender

- Prefer not to answer
- Female
- Male
- Transgender female
- Transgender male
- Gender non-binary
- Not listed

*Confidential*

Page 13

---

**Education level**

- Unknown or prefer not to answer
- No schooling completed
- 8th grade or less
- 9th-12th grade-no diploma
- High school diploma
- GED or alternative credential
- Partial college
- Associates degree (for example: AA, AS)
- Bachelor's degree (for example: BA, BS)
- Master's degree (for example: MA, MS, MEng, MEd, MSW, MBA)
- Professional degree beyond bachelor's degree (for example: MD, DDS, DVM, LLB, JD)
- Doctorate degree (for example, PhD, EdD)

---

**Marital status**

- Prefer not to answer
- Married
- Living with a partner
- Divorced
- Separated
- Never been married
- Widowed

---

**Most recent occupation**

- Unknown or prefer not to answer
- Management Occupations
- Business and Financial Operations Occupations
- Computer and Mathematical Occupations
- Architecture and Engineering Occupations
- Life, Physical, and Social Science Occupations
- Community and Social Service Occupations
- Legal Occupations
- Education, Training, and Library Occupations
- Arts, Design, Entertainment, Sports, and Media Occupations
- Healthcare Practitioners and Technical Occupations
- Healthcare Support Occupations
- Protective Service Occupations
- Food Preparation and Serving Related Occupations
- Building and Grounds Cleaning and Maintenance Occupations
- Personal Care and Service Occupations
- Sales and Related Occupations
- Office and Administrative Support Occupations
- Farming, Fishing, and Forestry Occupations
- Construction and Extraction Occupations
- Installation, Maintenance, and Repair Occupations
- Production Occupations
- Transportation and Materials Moving
- Homemaker
- Other - list below

---

**Other occupation**  

---

*Confidential*

Page 14

---

**Employment status**

- Prefer not to answer
- Full time (more than 35 hours/week)
- Part time (less than or equal to 35 hours/week)
- Unemployed
- Student
- Not working, disabled
- Retired

---

**Income**

- Unknown or prefer not to answer
- Less than \$10,000
- \$10,000 to \$19,999
- \$20,000 to \$34,999
- \$35,000 to \$49,999
- \$50,000 to \$74,999
- \$75,000 to \$99,999
- \$100,000 to \$149,999
- \$150,000 to \$199,999
- \$200,000 to \$299,999
- \$300,000 or more

---

**Race (please choose ALL that apply, and then specify below in primary origin questions)**

- Unknown or prefer not to answer
- African or Black
- Native, Indigenous, First Nations
- Asian
- White
- Hispanic or Latino/Latina

---

**Describe white origin (e.g., English, Italian, German)**

---

---

**Describe Black origin (e.g., Nigerian, Jamaican, Somali)**

---

---

**Describe Asian origin (e.g., Vietnamese, Chinese, Japanese, Korean, Hmong, Pakistani)**

---

---

**Describe native or indigenous origin (e.g., Australian Aboriginal, Aztec, Navajo)**

---

---

**Describe Hispanic or Latino origin (e.g., Mexican, Spanish, Cuban, Salvadoran)**

---

Confidential

Page 15

---

**Religion**

- Prefer not to answer
- Protestant
- Catholic
- Mormon
- Orthodox such as Greek or Russian Orthodox
- Jewish
- Muslim
- Buddhist
- Hindu
- Atheist
- Agnostic
- Nothing in particular
- Other (describe below)

---

**Other religion:**  

---

---

**YOU HAVE COMPLETED THE DEMOGRAPHICS REGISTRY INFORMATION. Thank you!**

---

**HEALTH INFORMATION**

The questions in this section will help the registry team and researchers better determine your eligibility for future studies. By answering "yes", the registry survey will give you the opportunity to provide this information (e.g., height and weight, neurological difficulties, psychological difficulties, reproductive health for females, general health conditions). You can choose to answer or not answer any question. Answering "no" will take you to the next section.

Do you choose to provide health information?

\*must provide value

- Yes
- No

---

**Metric Standard**

- Metric (cm/kg)
- Standard/Imperial (ft/lbs)

---

**Height (centimeters)**  

---

---

**Weight (kilograms)**  

---

---

**Height (feet) - enter additional inches below**  

---

*Confidential*

Page 16

---

Height (additional inches)

---

---

Weight (pounds)

---

---

Neurological symptoms

- Prefer not to answer
- Resting tremor (tremor when the muscle is relaxed and the body is at rest)
- Intention tremor (tremor during purposeful movement to a target, or to perform an action, such as reaching or a cup or while handwriting)
- Postural tremor (tremor when holding a position, such as when arms are outstretched)
- Head tremor
- Slowness of movements
- Balance problems
- Walking problems
- Repeated falls
- Use of cane or walker
- Use of a wheelchair
- Numbness or tingling sensations in legs, feet, arms or hands
- Swallowing or choking problems
- Migraine headache
- Parkinson's disease or parkinsonism
- Dementia or Alzheimer's disease
- Vertigo or dizziness
- Hearing loss
- Chronic pain
- Fibromyalgia
- None of the above
- Other

---

Other Neurological Problems



*Confidential*

Page 17

---

**Autoimmune**

- Prefer not to answer
- Rheumatoid arthritis
- Psoriasis/psoriatic arthritis
- Multiple Sclerosis
- Systemic lupus erythematosus
- Inflammatory bowel disease
- Addison's disease
- Grave's disease
- Hyper-thyroidism
- Sjögren's syndrome
- Hashimoto's thyroiditis
- Hypo-thyroidism
- Myasthenia gravis
- Celiac disease
- Pernicious anemia
- Autoimmune vasculitis
- None of the above
- Other

---

**Other Autoimmune**

---

**POI Symptoms**

- Prefer not to answer
- Irregular or skipped periods
- Hot flashes
- Mood swings
- Problems with fertility
- Osteopenia or osteoporosis
- None of the above

---

**Menopause status**

- Prefer not to answer
- Pre-menopause (before menopause; having regular periods)
- Peri-menopause/menopause transition (changes in periods, but have not gone 12 months in a row without a period)
- Post-menopause (after menopause)
- I am not sure

---

**Menopause Age**  

---

*Confidential*

Page 18

---

**Other Health Conditions**

- Prefer not to answer
- Cardiac/heart disease
- Hypertension (high blood pressure)
- Hypo-tension (abnormally low blood pressure)
- Kidney disease
- Liver disease
- Sleep apnea
- Respiratory disease
- Type I Diabetes
- Type II Diabetes
- Alcohol or substance use problems
- Sleep disorder
- Any type of cancer
- Sexual dysfunction
- Bladder or bowel incontinence
- Other (please describe below)
- None of the above

---

**Other medical problems**

---

**Psychiatric**

- Prefer not to answer
- Anxiety (e.g., phobias/fears, generalized anxiety, social anxiety, panic)
- Depression (e.g., major depression, dysthymia, postpartum depression)
- Bipolar disorder or mania
- Stress-related disorder [post-traumatic stress disorder (PTSD), acute stress disorder, adjustment disorder]
- Eating disorder (anorexia, bulimia)
- Sleep disorder (insomnia, restless legs syndrome)
- Alcohol or substance use problem or diagnosis
- Psychotic disorder such as schizophrenia
- Obsessive-compulsive type disorder (OCD, hoarding disorder, skin picking, hair pulling)
- Personality disorder
- Attention deficit hyperactivity disorder (ADHD)
- Autism spectrum disorder/Asperger's disorder
- Intellectual disability or developmental delay
- Specific learning disorder (dyslexia, math disorder)
- Language or communication disorder
- Tourette's disorder or other tic disorder
- Other (Please describe below)
- None of the above

---

**Other Psychiatric Problems**

---

YOU HAVE COMPLETED THE REGISTRY HEALTH INFORMATION. Thank you!

---

YOU HAVE COMPLETED ALL THE SECTIONS OF THE REGISTRY. Thank you! In order for your responses to be entered into the Registry, you must click "Submit". You will be provided with a copy of your responses in PDF format.
